# Supplementary material for: Characterization of the pathoimmunology of necrotizing enterocolitis reveals novel therapeutic opportunities
Source: PubMed Central journal article supplement (PMC7666196; doi:10.1038/s41467-020-19400-w), 2020-11-13
Supplement: 41467_2020_19400_MOESM1_ESM.pdf [file 41467_2020_19400_MOESM1_ESM.pdf]

## **Supplementary Information**

accompanying

### **Characterization of the Pathoimmunology of Necrotizing Enterocolitis Reveals Novel Therapeutic Opportunities**

S. X. Cho, C. A. Nold-Petry, M. F. Nold et al.

**Supplementary Figures and Legends**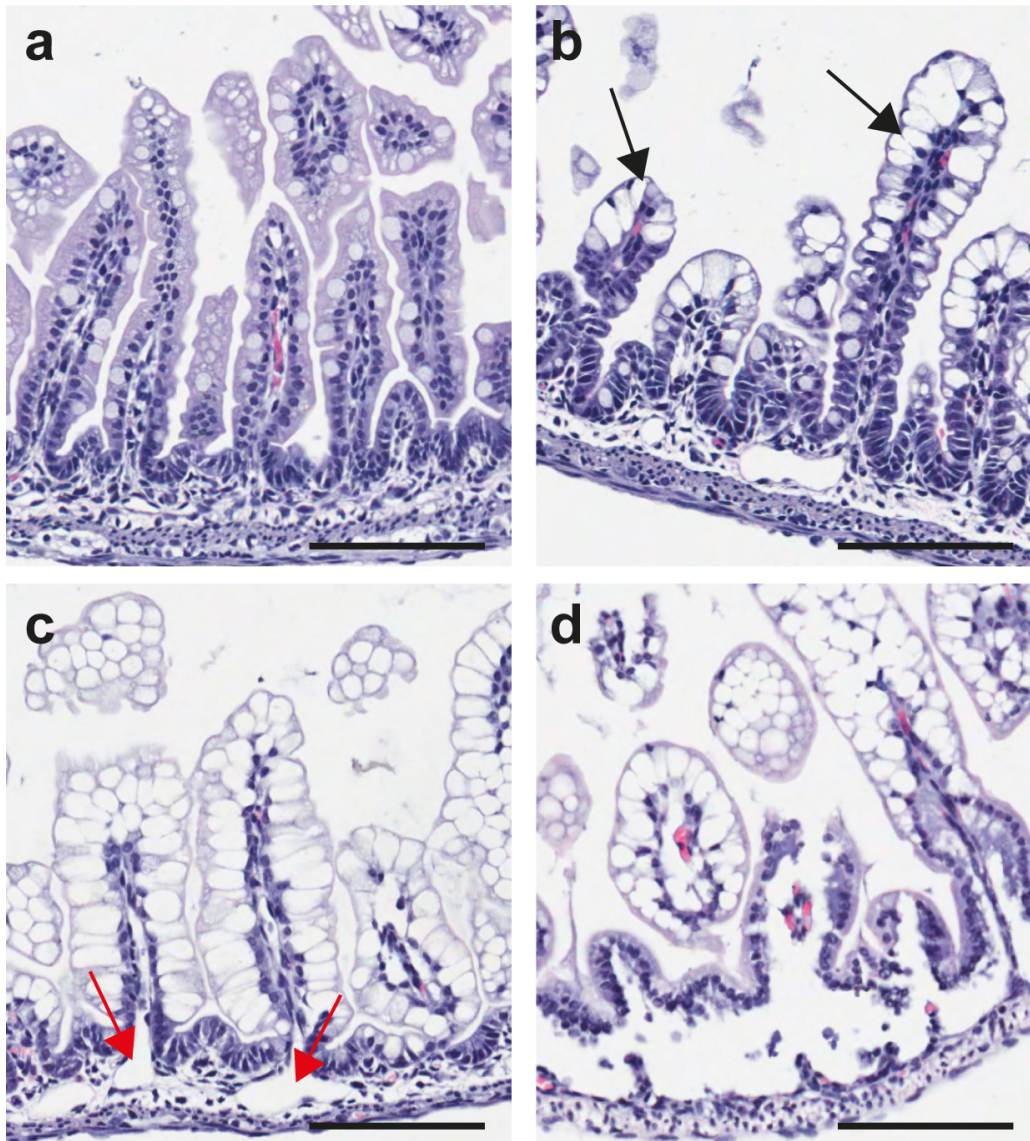

**Supplementary Figure 1. Histological scoring of the intestine in neonatal mice.** 4 $\mu$ m sections were stained with hematoxylin and eosin showing representative photomicrographs for each morphologic grading score. **a** Score 0, normal. **b** Score 1, moderate enterocyte vacuolation (denoted by black arrows). **c** Score 2, severe enterocyte vacuolation with edema in the lamina propria (denoted by red arrows). **d** Score 3, severe villi enterocyte vacuolation and mucosal disintegration. Magnification 200x; scale bars indicate 50 $\mu$ m.

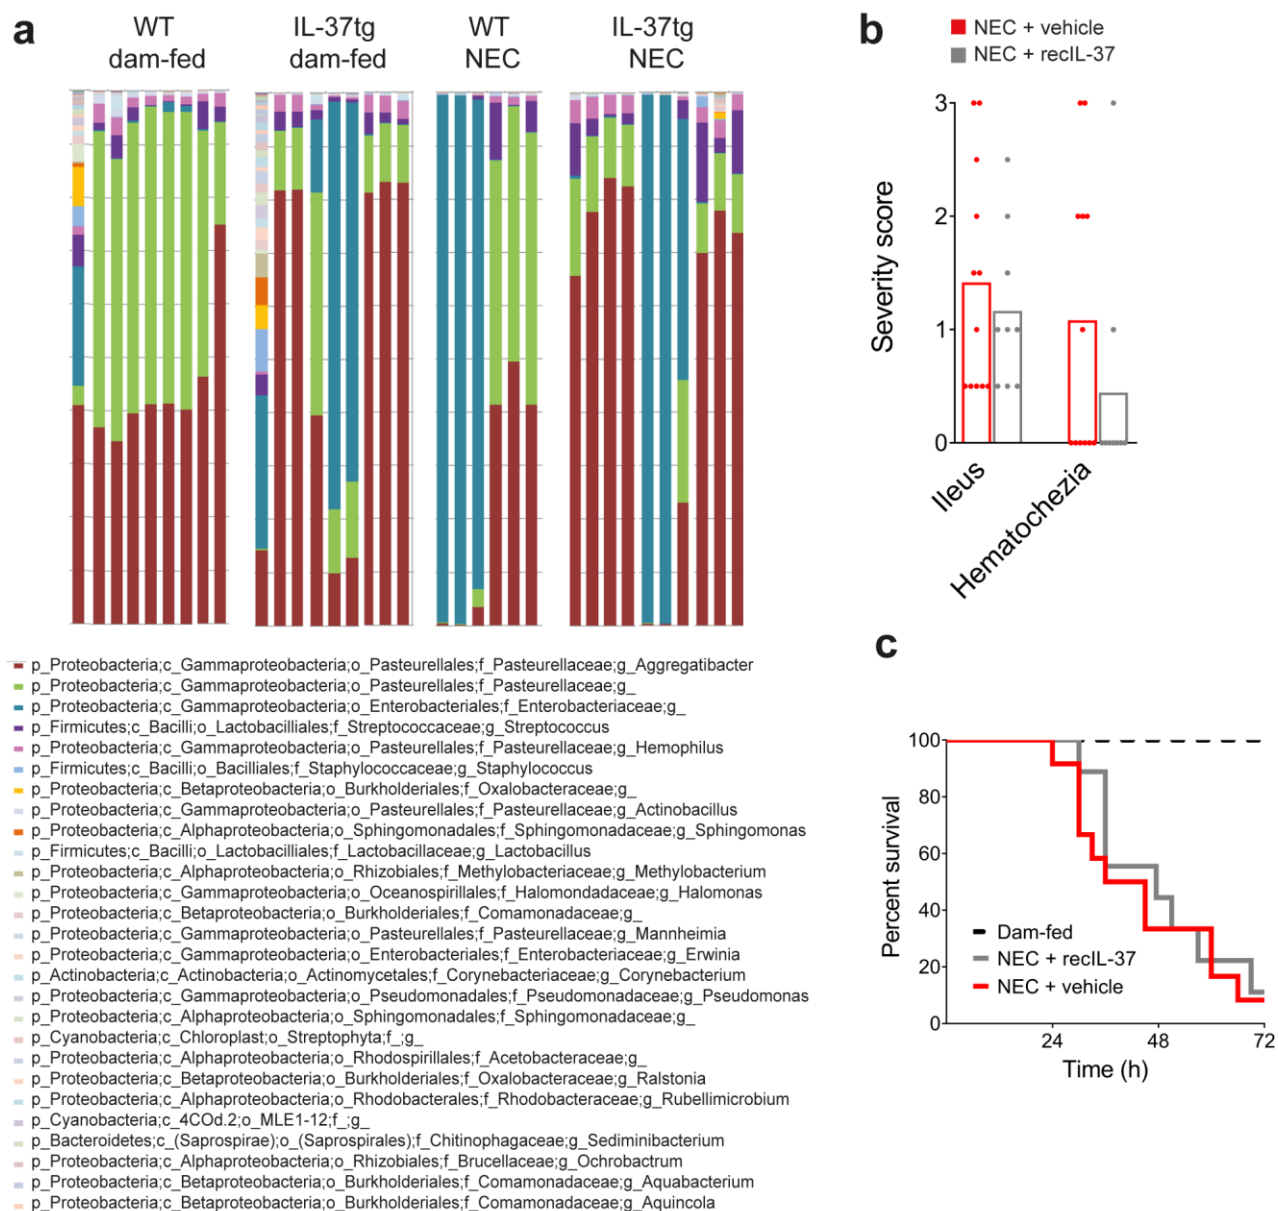

**Supplementary Figure 2. Summary of distribution of microbial taxonomies identified in mouse pups and effects of reclL-37 injection on clinical symptoms and survival.** **a** Microbial DNA from cecal tissue samples of some of the newborn WT and IL-37tg mouse pups shown in Figs. 2-5 (n=9 pups for both WT and IL-37tg dam-fed, n=6 for WT NEC and n=10 for IL-37tg NEC) were subjected to the NEC model, followed by sequencing and identification of taxonomy distributions. Data are from 2-4 independent experiments. **b, c** Clinical symptoms **b** and survival **c** were analyzed in the same mice shown in Fig. 2i, i.e. pups injected with 40µg/kg of reclL-37 or vehicle 12-hourly that underwent the NEC model. n=12 pups for NEC+vehicle, 9 for NEC+reclL-37. **b** Mean severity scores of symptoms on a 0-3 scale (no to severe pathology, see Methods) are shown as bars; dots show data points in individual pups. **c** Percent survival is depicted.

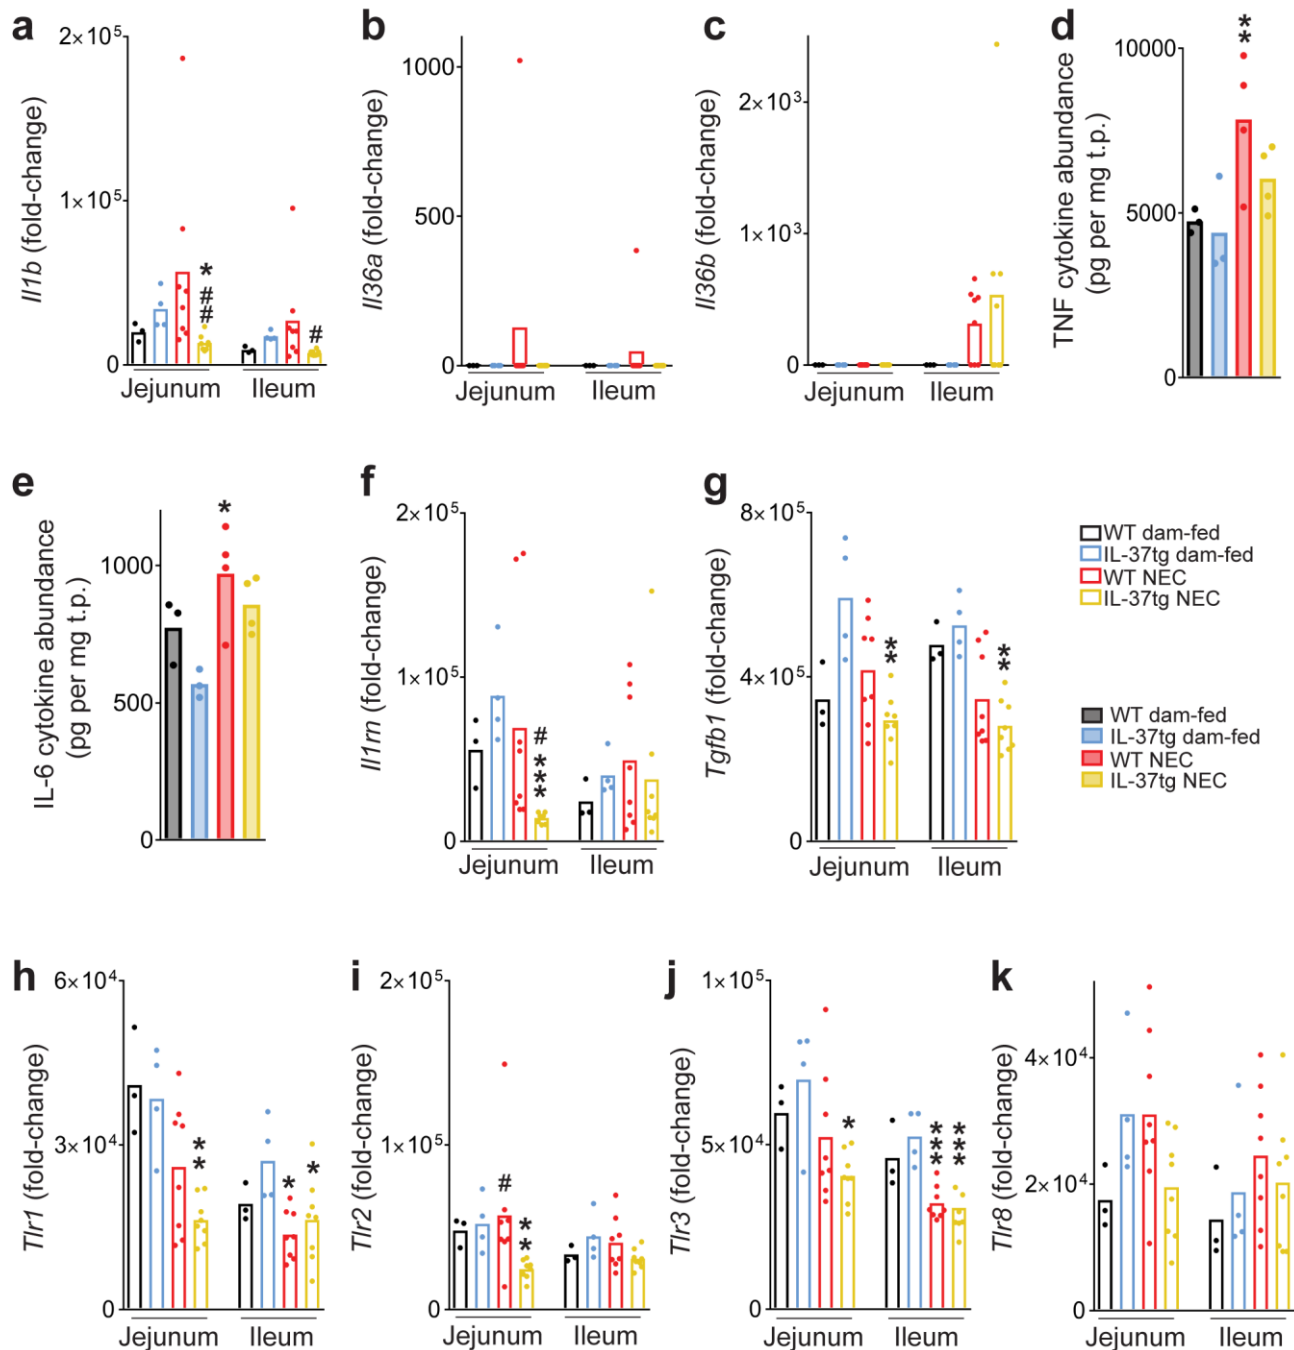

**Supplementary Figure 3. Other pro- and anti-inflammatory mediators and TLRs in murine NEC.** The same intestinal tissue lysates as in Fig. 3 were measured for gene expression by multiplex real-time PCR (**a-c, f-k**) or protein abundance by ELISA (**d, e**). Dots indicate data from individual mice and bars indicate means. Data are from 2-3 independent experiments; one-way ANOVA or one-way ANOVA on ranks *P* values: \*, *P*<0.05; \*\*, *P*<0.01; \*\*\*, *P*<0.001 for IL-37tg or WT NEC compared to dam-fed controls (see Methods). #, *P*<0.05; ##, *P*<0.01 for WT NEC compared to IL-37tg NEC. **a-c, f-k** Real-time PCR results of the indicated genes were normalized to *Hprt1* and are shown as fold-change relative to the lowest expressed gene. *n*=3 pups for WT dam-fed, 4 for IL-37tg dam-fed, 8 for both WT and IL-37tg NEC. **d, e** Ileal cytokine abundance of the indicated protein normalized to total protein (see Methods) is shown. *n*=3 for both WT and IL-37tg dam-fed, *n*=4 for both WT and IL-37tg NEC.

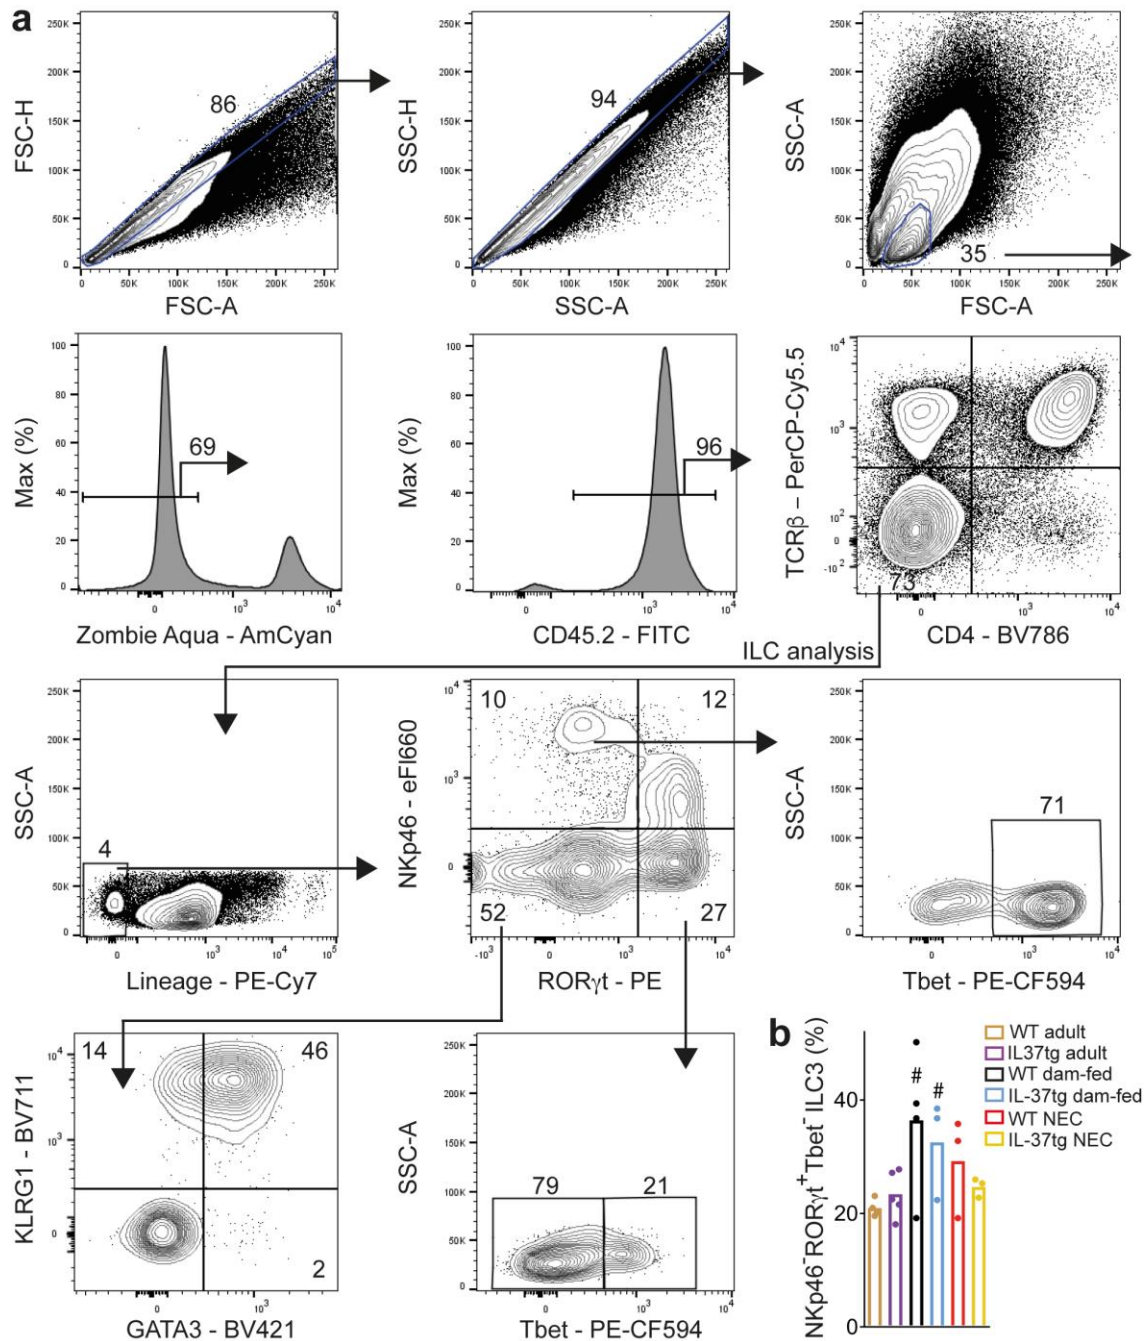

**Supplementary Figure 4. Murine intestinal T cells and ILC.** Flow cytometric analysis was performed on the same cells as in Fig. 4, Fig. 5b-c and Supplementary 5h-i, i.e. lamina propria cells from the small intestine. Data are from n=2-3 independent experiments. n=4 mice for WT adult, 5 for IL-37tg adult; and n=4 pups for WT dam-fed and 3 each for IL-37tg dam-fed, WT and IL-37tg NEC. (a) Gating strategy for ILC flow analysis. Doublets were excluded, lymphocytes were then gated for further analysis. Live CD45<sup>+</sup> cells were then selected for CD4<sup>-</sup>TCRβ<sup>+</sup> or CD4<sup>+</sup>TCRβ<sup>+</sup> T cells shown in Fig. 5b-c and Supplementary Fig. 5h-i, respectively. For ILC data shown in Fig. 4 and Supplementary Fig. 4b, TCRβ<sup>-</sup>CD4<sup>-</sup>LIN<sup>-</sup> cells were further analyzed for the expression of NKp46 and RORγt to allow for the discrimination of RORγt<sup>+</sup>NKp46<sup>+</sup>Tbet<sup>+</sup> ILC1, RORγt<sup>+</sup>NKp46<sup>-</sup>KLRG1<sup>-/+</sup>GATA3<sup>+</sup> ILC2, RORγt<sup>+</sup>NKp46<sup>-</sup> ILC3, NKp46<sup>-</sup>RORγt<sup>+</sup>Tbet<sup>-</sup> ILC3 and NKp46<sup>-</sup>RORγt<sup>+</sup>Tbet<sup>+</sup> ILC3. (b) Percentage of NKp46<sup>+</sup>RORγt<sup>+</sup>Tbet<sup>-</sup> ILC3 is shown as data points from individual mice (dots) and means (bars). One-way ANOVA *P* values: #, *P*<0.05 for dam-fed compared to adults (see Methods).

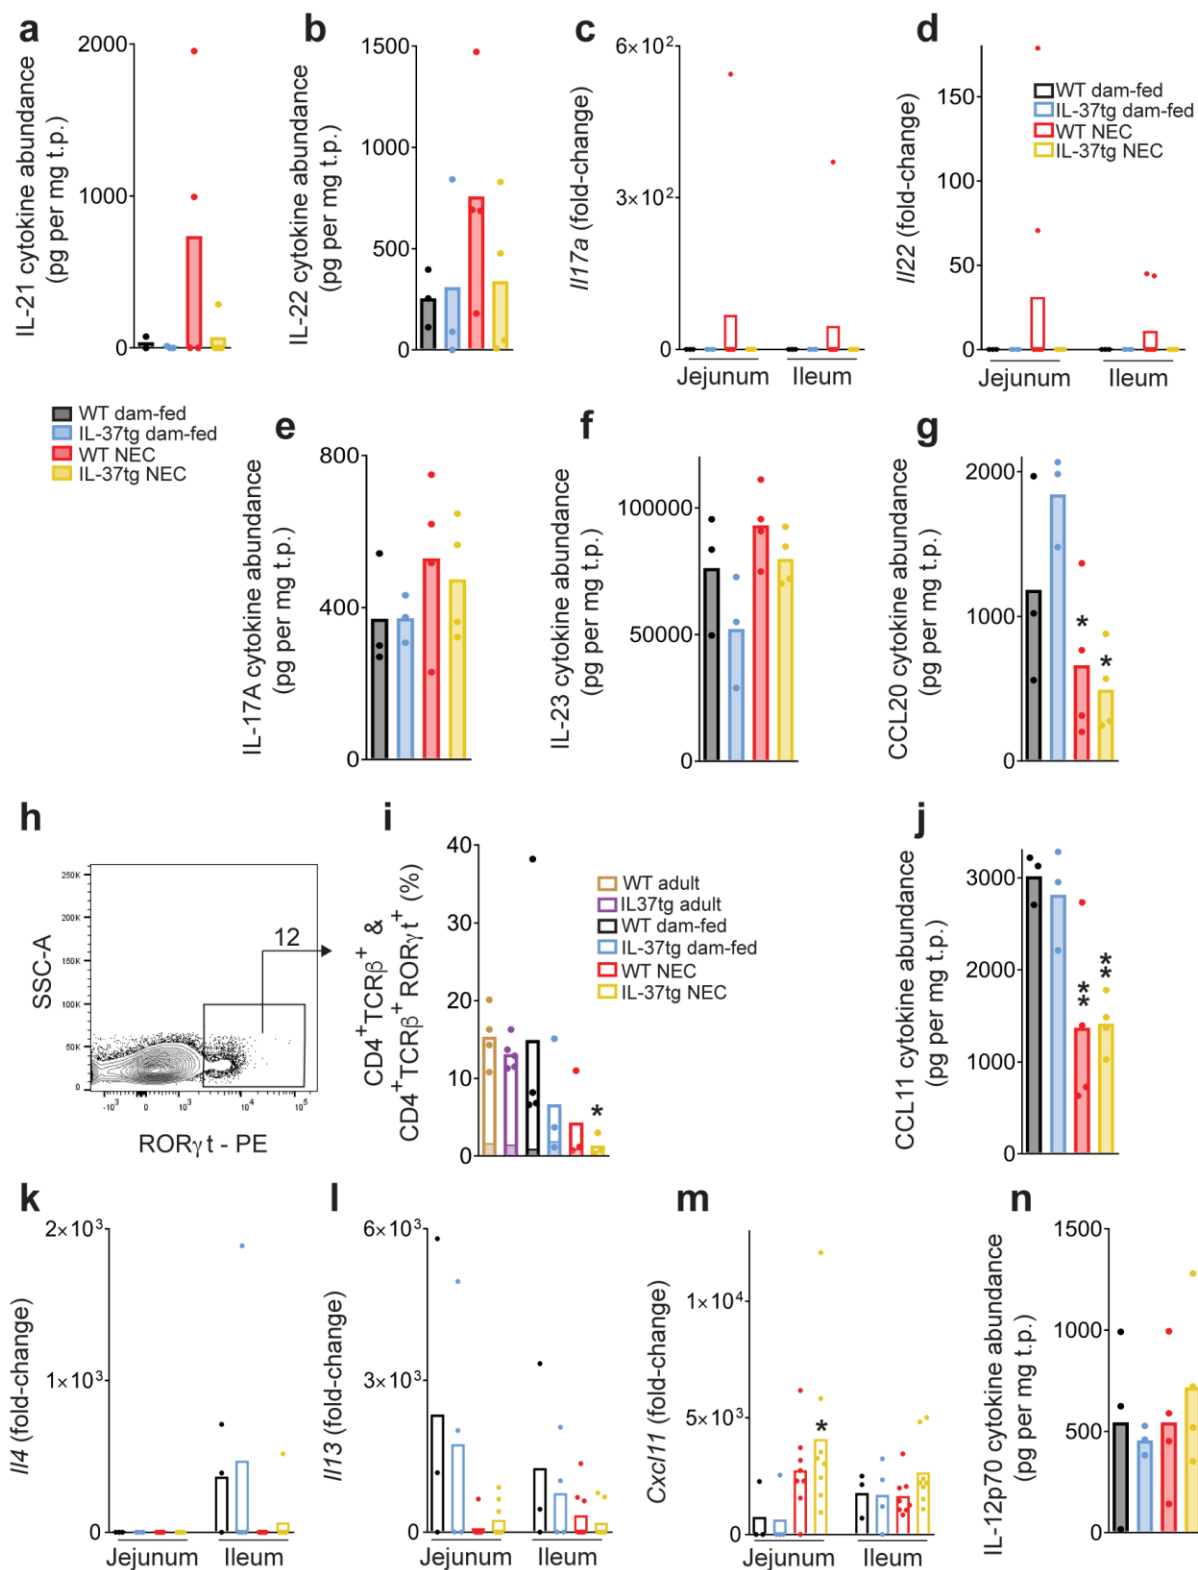

**Supplementary Figure 5. Other mediators of adaptive immunity in NEC.** The same intestinal tissue lysates as in Figs. 3 and 4 were assayed for gene expression by multiplex real-time PCR (open bars) and protein abundance either by ELISA (filled bars) or flow cytometry. Mediators prototypically belong to the adaptive immunity categories type 3 (a-i), type 2 (j-l) or type 1 (m, n). a-g, j-n Data are from 2-3 independent

experiments; for details, see Source Data file. ANOVA on ranks *P* values: \*,  $P < 0.05$  and \*\*,  $P < 0.01$  for IL-37tg or WT NEC compared to dam-fed controls. **a, b, e-g, j, n** Ileal protein abundance of the indicated mediators is depicted as individual measurements (dots) and means (bars) of cytokine abundance normalized to total protein (t.p.).  $n=3$  pups for both WT and IL-37tg dam-fed, 4 for both WT and IL-37tg NEC. **c, d, k-m** Real-time PCR results for the indicated genes were normalized to *Hprt1* and are depicted as fold-change relative to the lowest expressed gene. Bars show means, dots indicate data points from individual pups.  $n=3$  pups for WT dam-fed, 4 for IL-37tg dam-fed, 8 for both WT and IL-37tg NEC. **h, i** Flow cytometric analysis for T cells on the same cells as in Fig. 4 was performed. **h** Representative gating plot for CD4<sup>+</sup>TCRβ<sup>+</sup>RORγt<sup>+</sup> cells, which originate from the live CD45<sup>+</sup> lymphocyte gate; arrows indicate source of the accompanying solid color fill in graphs. **i** Graphs show CD4<sup>+</sup>TCRβ<sup>+</sup> cells under live CD45<sup>+</sup> lymphocytes as mean percentage (bars) and data points from individual mice (dots). One-way ANOVA or ANOVA on ranks *P* value: \*\*,  $P < 0.01$  for IL-37tg NEC compared to adult (see Methods).  $n=4$  mice for WT adult, 5 for IL-37tg adult; and  $n=4$  pups for WT dam-fed and 3 each for IL-37tg dam-fed, WT and IL-37tg NEC. The solid color fill in represents the mean percentage within each bar that is RORγt<sup>+</sup>.

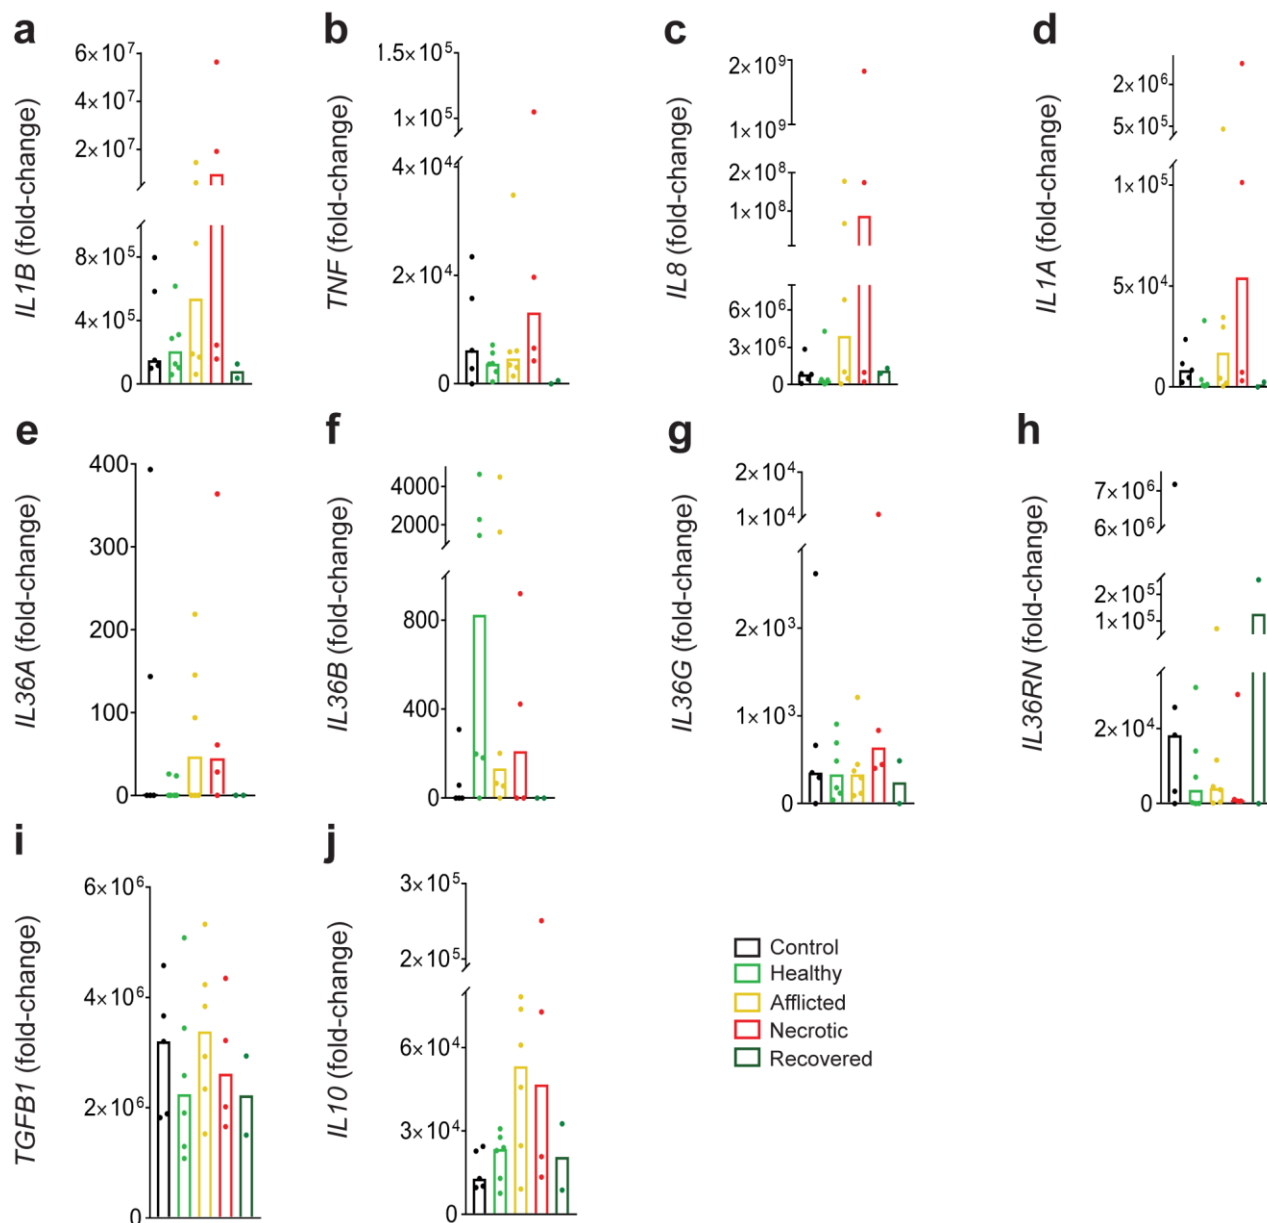

**Supplementary Figure 6. Other markers of innate immunity in human NEC.** Expression of pro- (a-g) and anti- (h-j) inflammatory innate immune mediators was determined by multiplex real-time PCR in the same intestinal tissue sections from acute (n=6 healthy/afflicted, n=4 necrotic) and recovered (n=2) NEC as well as non-NEC controls (n=5) as in Fig. 6. Real-time PCR results for the indicated genes were normalized to *ACTB* and depicted as fold-change relative to the lowest expressed gene; dots indicate data from individual patients and bars indicate medians.



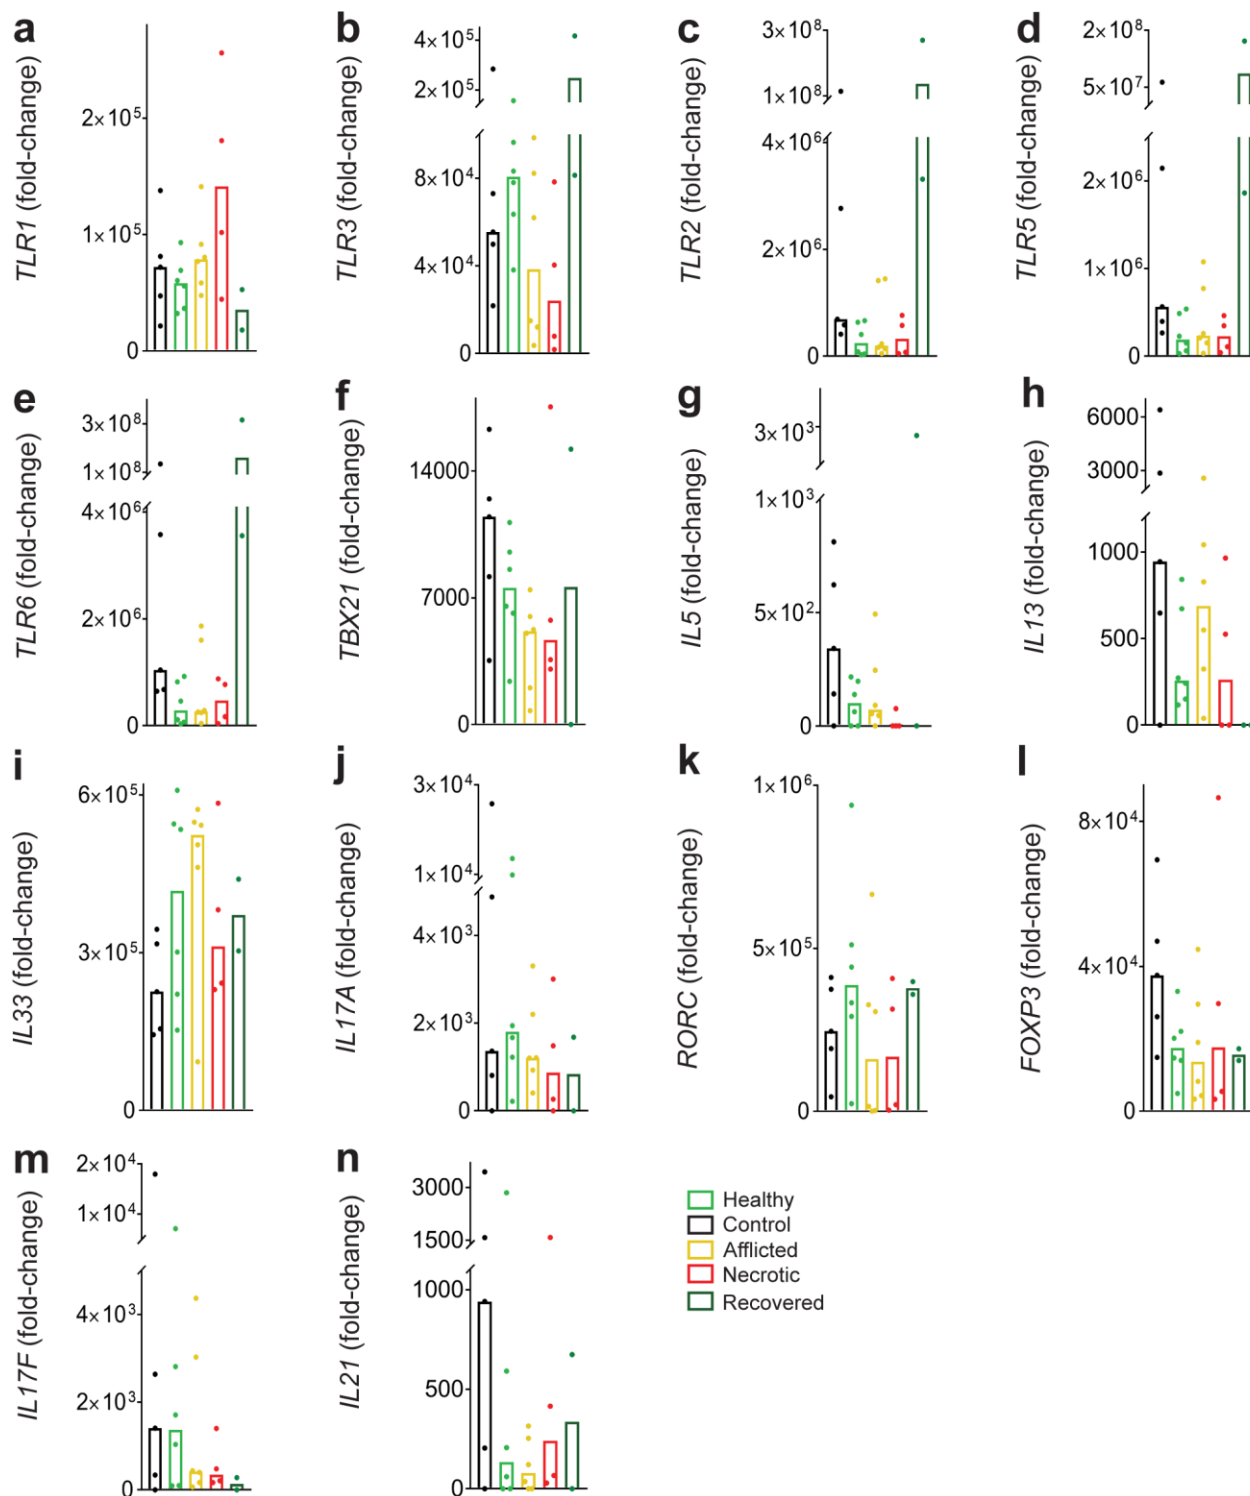

**Supplementary Figure 7. Other innate and adaptive Toll-like receptors in human NEC.** Expression of Toll-like receptors (**a-e**) as well as adaptive immune type 1 (**f**), type 2 (**g-i**), type 3 (**j, k, m, n**) and Treg (**l**) polarization was determined by multiplex real-time PCR in the same intestinal tissue sections from acute (n=6 healthy/afflicted, n=4 necrotic) and recovered (n=2) NEC as well as non-NEC controls (n=5) as in Fig. 6. Real-time PCR results for the indicated genes were normalized to *ACTB* and depicted as fold-change relative to the lowest expressed gene; data are means (bars) and individual PCR results (dots).

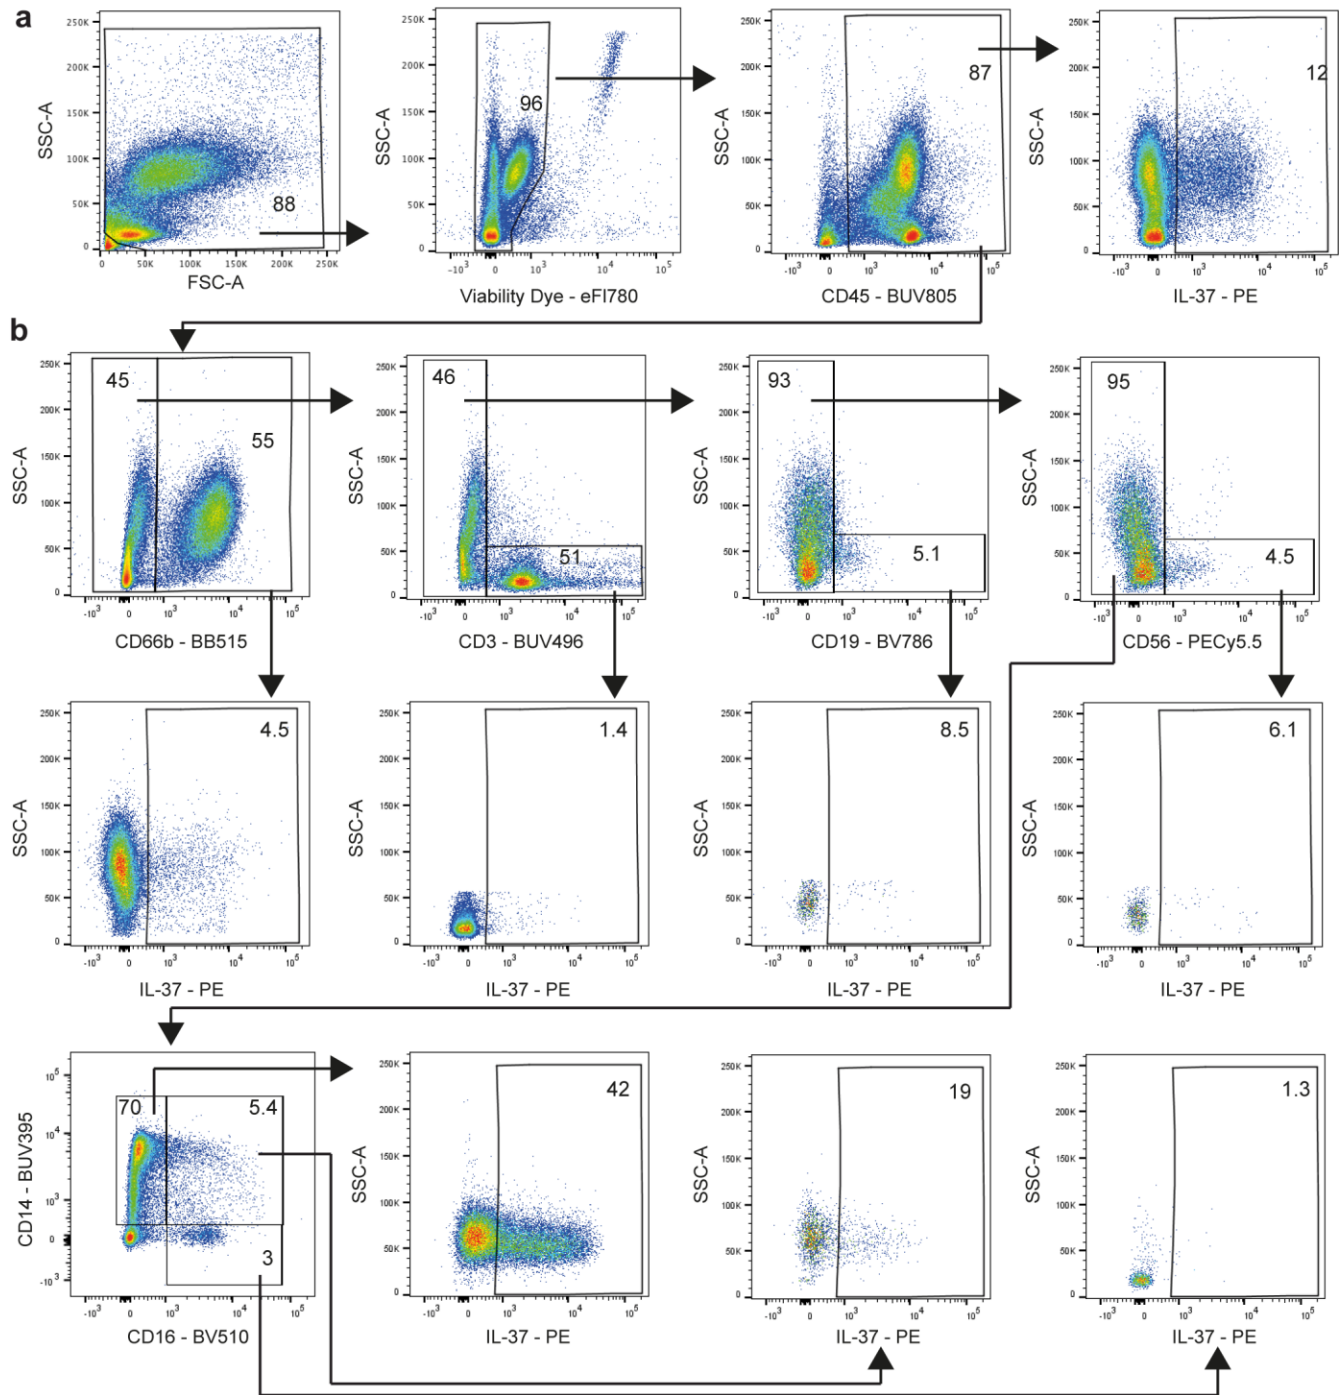

**Supplementary Figure 8. Gating strategy for flow cytometry data analysis from cohort 2.** Peripheral blood was obtained from a second cohort of premature infants (gestational age 24-29 weeks, n=21), subjected to flow cytometry and analyzed to produce the data shown in Fig. 8 using the gating strategies presented here. **a** Doublets and debris were excluded. Live (identified by fixable viability dye) CD45<sup>+</sup> cells were then gated for IL-37<sup>+</sup> cells as shown (pertinent data in Fig. 8a-b). **b** For further investigation of IL-37 within subpopulations, cells were gated under live CD45<sup>+</sup> cells in the order depicted in **a**, then further subgated for neutrophils (CD66b<sup>+</sup>), T cells (CD66b<sup>-</sup>CD3<sup>+</sup>), B cells (CD66b<sup>-</sup>CD3<sup>-</sup>CD19<sup>+</sup>), NK cells (CD66b<sup>-</sup>CD3<sup>-</sup>CD19<sup>-</sup>CD56<sup>+</sup>) or monocytes (pertinent data presented in Fig. 8c-h). Percentages are indicated by numbers within or next to boxed fields.

### Supplementary Tables and Table Legends

|                         | Gestational age at birth (weeks +days) | Weight at birth (g) | Age at operation (days) | Weight at operation (g) | Localization of ileostoma proximal to ileocecal junction (cm) |
|-------------------------|----------------------------------------|---------------------|-------------------------|-------------------------|---------------------------------------------------------------|
| Control 1               | 33+6                                   | 2240                | 78                      | 2340                    | 10                                                            |
| Control 2               | 25+2                                   | 740                 | 102                     | 2600                    | 1                                                             |
| Control 3               | 35+2                                   | 1800                | 252                     | 5200                    | 10                                                            |
| Control 4               | 25+4                                   | 630                 | 150                     | 3740                    | 15                                                            |
| Control 5               | 24+3                                   | 740                 | 119                     | 2500                    | 10                                                            |
| Control 6               | 25+5                                   | 860                 | 59                      | 1100                    | 10                                                            |
| Control 7               | 28+1                                   | 640                 | 76                      | 2000                    | 10                                                            |
| Control 8               | 39+4                                   | 4190                | 31                      | 4300                    | 30                                                            |
| Control 9               | 25+6                                   | 845                 | 104                     | 2300                    | 2                                                             |
| NEC 1                   | 26+5                                   | 950                 | 24                      | 1290                    | 20                                                            |
| NEC 2                   | 25+5                                   | 735                 | 49                      | 1400                    | 8                                                             |
| NEC 3                   | 25+0                                   | 550                 | 10                      | 585                     | No stoma                                                      |
| NEC 4                   | 23+4                                   | 470                 | 27                      | 670                     | 5                                                             |
| NEC 5                   | 26+1                                   | 680                 | 38                      | 1140                    | No stoma                                                      |
| NEC 6                   | 24+4                                   | 740                 | 12                      | 815                     | 7                                                             |
| Recovered 1 (NEC 2)     | 25+5                                   | 735                 | 111                     | 2200                    | 10                                                            |
| Recovered 2 (unmatched) | 27+2                                   | 1047                | 155                     | 4780                    | 8                                                             |

**Supplementary Table 1. Human patient details cohort 1.** All NEC infants were Stage III. Controls 1, 3, 5, 8 were excluded from RNA analysis due to failure of RNA isolation/PCR.

|                                                    | Absolute value | % or SD/IQR | No NEC | % or SD/IQR | NEC  | % or SD/IQR | P non-NEC vs NEC |
|----------------------------------------------------|----------------|-------------|--------|-------------|------|-------------|------------------|
| Study participants                                 | 21             | n/a         | 16     | 76%         | 5    | 24%         | n/a              |
| Prenatal steroid use (%)                           | 21             | 100%        | 16     | 100%        | 5    | 100%        | 1                |
| Prenatal steroid use (median doses)                | 2              |             | 2      |             | 2    |             | 0.926            |
| PPROM (%)                                          | 9              | 43%         | 7      | 44%         | 2    | 40%         | 0.923            |
| Cesarean section (%)                               | 15             | 71%         | 10     | 63%         | 5    | 100%        | 0.126            |
| Histopathological evidence of chorioamnionitis (%) | 11             | 52%         | 9      | 56%         | 2    | 40%         | 0.567            |
| IUGR (%)                                           | 5              | 24%         | 2      | 13%         | 3    | 60%         | 0.039            |
| Birth weight (mean ± SD, g)                        | 937            | 176         | 965    | 189         | 850  | 89          | 0.342            |
| GA (mean ± SD, weeks+days)                         | 27+0           | 9.5         | 26+6   | 9.6         | 27+1 | 10.1        | 0.772            |
| Male (%)                                           | 12             | 57%         | 8      | 50%         | 4    | 80%         | 0.268            |
| 1 min Apgar score (median-IQR)                     | 5              | (3-6.5)     | 5      | (3-6)       | 5    | (2-7)       | 0.809            |
| 5 min Apgar score (median-IQR)                     | 8              | (5.5-8.5)   | 7      | (5.3-8)     | 8    | (4-9.5)     | 0.586            |
| Severe ICH/IVH (Grade III-IV, %)                   | 1              | 5%          | 1      | 6%          | 0    | 0%          | 0.655            |
| Early-onset sepsis (First 72 h, %)                 | 6              | 29%         | 5      | 31%         | 1    | 20%         | 0.673            |
| Late-onset sepsis (After 72h, %)                   | 9              | 43%         | 5      | 31%         | 4    | 80%         | 0.068            |

**Supplementary Table 2. Human patient details cohort 2.** Of the 5 NEC infants, there were 3x Stage I, 1x Stage II and 1x Stage III. NEC, necrotizing enterocolitis; PPROM, preterm premature rupture of the membranes; IUGR, intrauterine growth restriction; GA, gestational age; ICH/IVH, intracranial/intraventricular hemorrhage.

| <b>Forward construct<br/>Primer name/region</b> | <b>Sequence</b>                                                                    |
|-------------------------------------------------|------------------------------------------------------------------------------------|
| Full Primer Sequence<br>(Fw-V4)                 | AATGATACGGCGACCACCGAGATCTACACTATGGTAATTGTGTGC<br>CAGCMGCCGCGGTAA                   |
| 5' illumina adapter                             | AATGATACGGCGACCACCGAG                                                              |
| Forward pad                                     | ATCTACACTATGGTAATT                                                                 |
| Forward linker                                  | GT                                                                                 |
| Fw primer sequence<br>(515F)                    | GTGCCAGCMGCCGCGGTAA                                                                |
| <b>Reverse construct<br/>Primer name/region</b> | <b>Sequence</b>                                                                    |
| Full Primer Sequence<br>(Rv-V4)                 | CAAGCAGAAGACGGCATAACGAGAT(12mer_Golay_Barcode)AGTC<br>AGTCAGCCGGACTACHVGGGTWTCTAAT |
| 3' illumina adapter                             | CAAGCAGAAGACGGCATAACGAGAT                                                          |
| Reverse pad                                     | AGTCAGTCAG                                                                         |
| Reverse linker                                  | CC                                                                                 |
| Rv primer sequence<br>(806R)                    | GGACTACHVGGGTWTCTAAT                                                               |
| <b>Sequencing<br/>Primer name</b>               | <b>Sequence</b>                                                                    |
| Read 1 primer                                   | TATGGTAATTGTGTGYCAGCMGCCGCGGTAA                                                    |
| Read 2 primer                                   | AGTCAGCCAGCCGGACTACNVGGGTWTCTAAT                                                   |
| Index primer                                    | AATGATACGGCGACCACCGAGATCTACACGCT                                                   |

**Supplementary Table 3. Forward and reverse primer constructs for 16S rDNA-V4 PCR.**

| <b>Sample ID</b>         | <b>Number of assigned reads</b> |
|--------------------------|---------------------------------|
| WT DF 1                  | 58,037                          |
| WT DF 2                  | 108,067                         |
| WT DF 3                  | 114,198                         |
| WT DF 4                  | 71,795                          |
| WT DF 5                  | 76,406                          |
| WT DF 6                  | 113,711                         |
| WT DF 7                  | 101,554                         |
| WT DF 8                  | 132,941                         |
| WT DF 9                  | 116,047                         |
| IL-37tg DF 1             | 89,570                          |
| IL-37tg DF 2             | 65,967                          |
| IL-37tg DF 3             | 97,403                          |
| IL-37tg DF 4             | 147,021                         |
| IL-37tg DF 5             | 63,591                          |
| IL-37tg DF 6             | 59,960                          |
| IL-37tg DF 7             | 106,815                         |
| IL-37tg DF 8             | 95,747                          |
| IL-37tg DF 9             | 153,964                         |
| WT NEC 1                 | 78,736                          |
| WT NEC 2                 | 81,347                          |
| WT NEC 3                 | 119,952                         |
| WT NEC 4                 | 71,672                          |
| WT NEC 5                 | 84,780                          |
| WT NEC 6                 | 90,556                          |
| IL-37tg NEC 1            | 81,174                          |
| IL-37tg NEC 2            | 56,958                          |
| IL-37tg NEC 3            | 41,811                          |
| IL-37tg NEC 4            | 116,589                         |
| IL-37tg NEC 5            | 114,931                         |
| IL-37tg NEC 6            | 103,084                         |
| IL-37tg NEC 7            | 116,618                         |
| IL-37tg NEC 8            | 112,110                         |
| IL-37tg NEC 9            | 142,160                         |
| IL-37tg NEC 10           | 69,929                          |
| <i>Total number seqs</i> | 3,255,201                       |

**Supplementary Table 4. Overview of reads assigned to each of the samples after multiplexing.**

| <b>Mouse assays</b>  |                 |
|----------------------|-----------------|
| <b>Gene name</b>     | <b>Assay ID</b> |
| <i>B2m</i>           | Mm00437762_m1   |
| <i>Cxcl1</i>         | Mm04207460_m1   |
| <i>Cxcl10</i>        | Mm00445235_m1   |
| <i>Cxcl11</i>        | Mm00444662_m1   |
| <i>Cxcr3</i>         | Mm00438259_m1   |
| <i>Foxp3</i>         | Mm00475162_m1   |
| <i>Gapdh</i>         | Mm99999915_g1   |
| <i>Gata3</i>         | Mm00484683_m1   |
| <i>Hprt1</i>         | Mm00446968_m1   |
| <i>Ido1</i>          | Mm00492586_m1   |
| <i>Il1b</i>          | Mm00434228_m1   |
| <i>Il4</i>           | Mm00445259_m1   |
| <i>Il6</i>           | Mm00446190_m1   |
| <i>Il13</i>          | Mm00434204_m1   |
| <i>Il17a</i>         | Mm00439618_m1   |
| <i>Il22</i>          | Mm00444241_m1   |
| <i>Il33</i>          | Mm00505403_m1   |
| <i>Il1f6 (Il36a)</i> | Mm00457645_m1   |
| <i>Il1f8 (Il36b)</i> | Mm01337546_g1   |
| <i>Il1f9 (Il36g)</i> | Mm00463327_m1   |
| <i>Il1rn</i>         | Mm00446186_m1   |
| <i>Tbx21 (Tbet)</i>  | Mm00450960_m1   |
| <i>Tgfb1</i>         | Mm00441724_m1   |
| <i>Tlr1</i>          | Mm00446095_m1   |
| <i>Tlr2</i>          | Mm00442346_m1   |
| <i>Tlr3</i>          | Mm01207404_m1   |
| <i>Tlr4</i>          | Mm00445273_m1   |
| <i>Tlr5</i>          | Mm00546288_s1   |
| <i>Tlr6</i>          | Mm02529782_s1   |
| <i>Tlr7</i>          | Mm00446590_m1   |
| <i>Tlr8</i>          | Mm04209873_m1   |
| <i>Tlr9</i>          | Mm00446193_m1   |
| <i>Tlr11</i>         | Mm01701924_s1   |
| <i>Tlr12</i>         | Mm01180204_s1   |
| <i>Tlr13</i>         | Mm01233819_m1   |

Supplementary Table 5. Taqman gene expression assays mouse studies.

| <b>Human assays</b>   |                 |
|-----------------------|-----------------|
| <b>Gene name</b>      | <b>Assay ID</b> |
| <i>ACTB</i>           | Hs01060665_g1   |
| <i>CXCL10</i>         | Hs00171042_m1   |
| <i>CXCL11</i>         | Hs00171138_m1   |
| <i>CXCR3</i>          | Hs01847760_s1   |
| <i>FOXP3</i>          | Hs01085834_m1   |
| <i>GAPDH</i>          | Hs02786624_g1   |
| <i>GATA3</i>          | Hs00231122_m1   |
| <i>HPRT1</i>          | Hs02800695_m1   |
| <i>IDO1</i>           | Hs00984148_m1   |
| <i>IFNG</i>           | Hs00989291_m1   |
| <i>IL1A</i>           | Hs00174092_m1   |
| <i>IL1B</i>           | Hs01555410_m1   |
| <i>IL5</i>            | Hs01548712_g1   |
| <i>IL6</i>            | Hs00174131_m1   |
| <i>IL8</i>            | Hs00174103_m1   |
| <i>IL10</i>           | Hs00961622_m1   |
| <i>IL13</i>           | Hs00174379_m1   |
| <i>IL17A</i>          | Hs00174383_m1   |
| <i>IL17F</i>          | Hs00369400_m1   |
| <i>IL17RA</i>         | Hs01056316_m1   |
| <i>IL21</i>           | Hs00222327_m1   |
| <i>IL22</i>           | Hs01574154_m1   |
| <i>IL33</i>           | Hs00369211_m1   |
| <i>IL1F5 (IL36RN)</i> | Hs01104220_m1   |
| <i>IL1F6 (IL36A)</i>  | Hs00205367_m1   |
| <i>IL1F8 (IL36B)</i>  | Hs00758166_m1   |
| <i>IL1F9 (IL36G)</i>  | Hs00219742_m1   |
| <i>NLRP3</i>          | Hs00918082_m1   |
| <i>RORC</i>           | Hs01076112_m1   |
| <i>TBX21 (TBET)</i>   | Hs00894392_m1   |
| <i>TGFB1</i>          | Hs00998133_m1   |
| <i>TLR1</i>           | Hs00413978_m1   |
| <i>TLR2</i>           | Hs02621280_s1   |
| <i>TLR3</i>           | Hs01551079_g1   |
| <i>TLR4</i>           | Hs00152939_m1   |
| <i>TLR5</i>           | Hs01920773_s1   |
| <i>TLR6</i>           | Hs01039989_s1   |
| <i>TLR7</i>           | Hs01933259_s1   |
| <i>TLR8</i>           | Hs00152972_m1   |
| <i>TLR9</i>           | Hs00370913_s1   |
| <i>TLR10</i>          | Hs01935337_s1   |
| <i>TNF</i>            | Hs00174128_m1   |

Supplementary Table 6. Taqman gene expression assays human studies.
